# Supplementary material for: SARS-CoV-2 infection elicits a rapid neutralizing antibody response that correlates with disease severity
Source: PubMed Central journal article supplement (PMC7843981; doi:10.1038/s41598-021-81862-9), 2021-01-28
Supplement: 41598_2021_81862_MOESM1_ESM.pdf [file 41598_2021_81862_MOESM1_ESM.pdf]

**SARS-CoV-2 infection elicits a rapid neutralizing antibody response that  
correlates with disease severity**

Benjamin Trinité<sup>1</sup>, Ferran Tarrés-Freixas<sup>1</sup>, Jordi Rodon<sup>2</sup>, Edwards Pradenas<sup>1</sup>,  
Victor Urrea<sup>1</sup>, Silvia Marfil<sup>1</sup>, Maria Luisa Rodriguez de la Concepción<sup>1</sup>, Carlos  
Ávila-Nieto<sup>1</sup>, Carmen Aguilar-Gurrieri<sup>1</sup>, Ana Barajas<sup>1</sup>, Raquel Ortiz<sup>1</sup>, Roger  
Paredes<sup>1,3</sup>, Lourdes Mateu<sup>3</sup>, Alfonso Valencia<sup>4</sup>, Victor Guallar<sup>4,5</sup>, Lidia Ruiz<sup>1</sup>,  
Eulàlia Grau<sup>1</sup>, Marta Massanella<sup>1</sup>, Jordi Puig<sup>3</sup>, Anna Chamorro<sup>3</sup>, Nuria  
Izquierdo-Useros<sup>1</sup>, Joaquim Segalés<sup>2,6</sup>, Bonaventura Clotet<sup>1,3,7</sup>, Jorge Carrillo<sup>1</sup>,  
Júlia Vergara-Alert<sup>2</sup>, Julià Blanco<sup>1,7,\*</sup>

<sup>1</sup>IrsiCaixa AIDS Research Institute, Germans Trias i Pujol Research Institute  
(IGTP), Can Ruti Campus, 08916, Badalona, Catalonia, Spain

<sup>2</sup>IRTA Centre de Recerca en Sanitat Animal (CReSA, IRTA-UAB), Campus de  
la UAB, 08193 Bellaterra, Catalonia, Spain

<sup>3</sup>Infectious Diseases Department, Fight against AIDS Foundation (FLS),  
Germans Trias i Pujol Hospital, Badalona, Catalonia, Spain

<sup>4</sup>Barcelona Supercomputing Center, Barcelona, Catalonia, Spain

<sup>5</sup>Catalan Institution for Research and Advanced Studies (ICREA), Barcelona,  
Catalonia, Spain

<sup>6</sup>UAB, CReSA (IRTA-UAB), Campus de la UAB, 08193 Bellaterra, (Cerdanyola  
del Vallès), Catalonia, Spain

<sup>7</sup>University of Vic–Central University of Catalonia (UVic-UCC), Vic, Catalonia,  
Spain

**SUPPLEMENTARY MATERIAL**

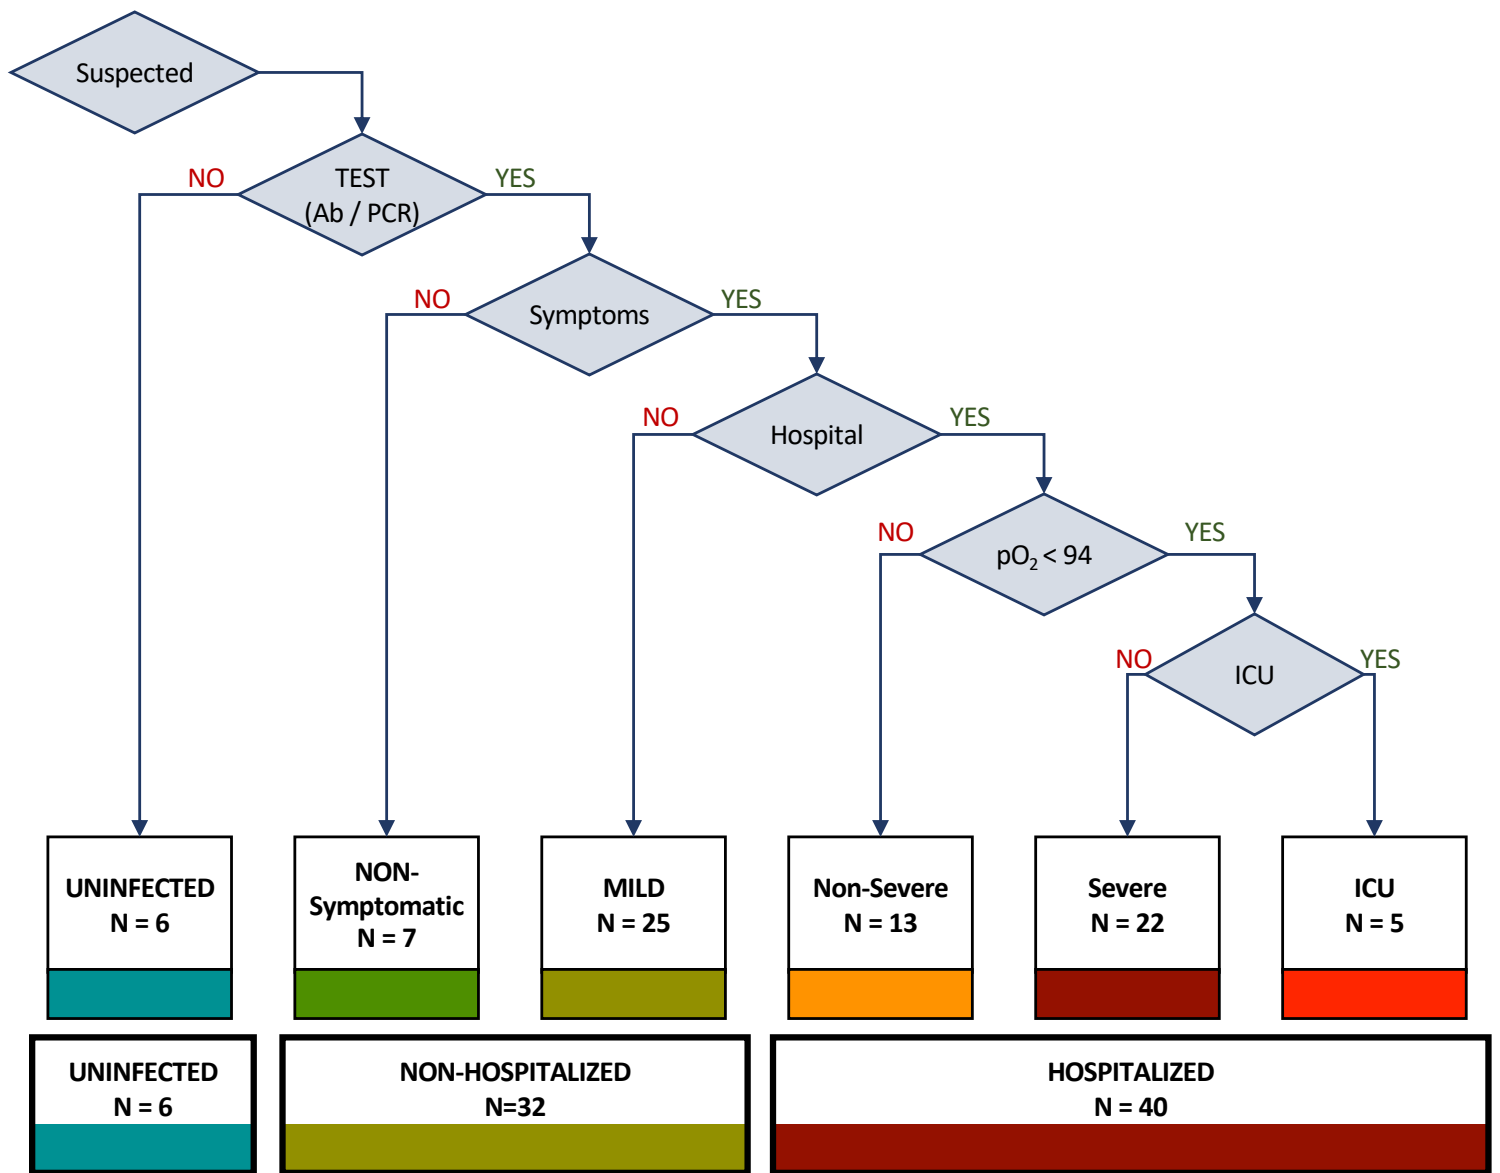

**Supplementary Figure 1.** Patients classification according to symptoms

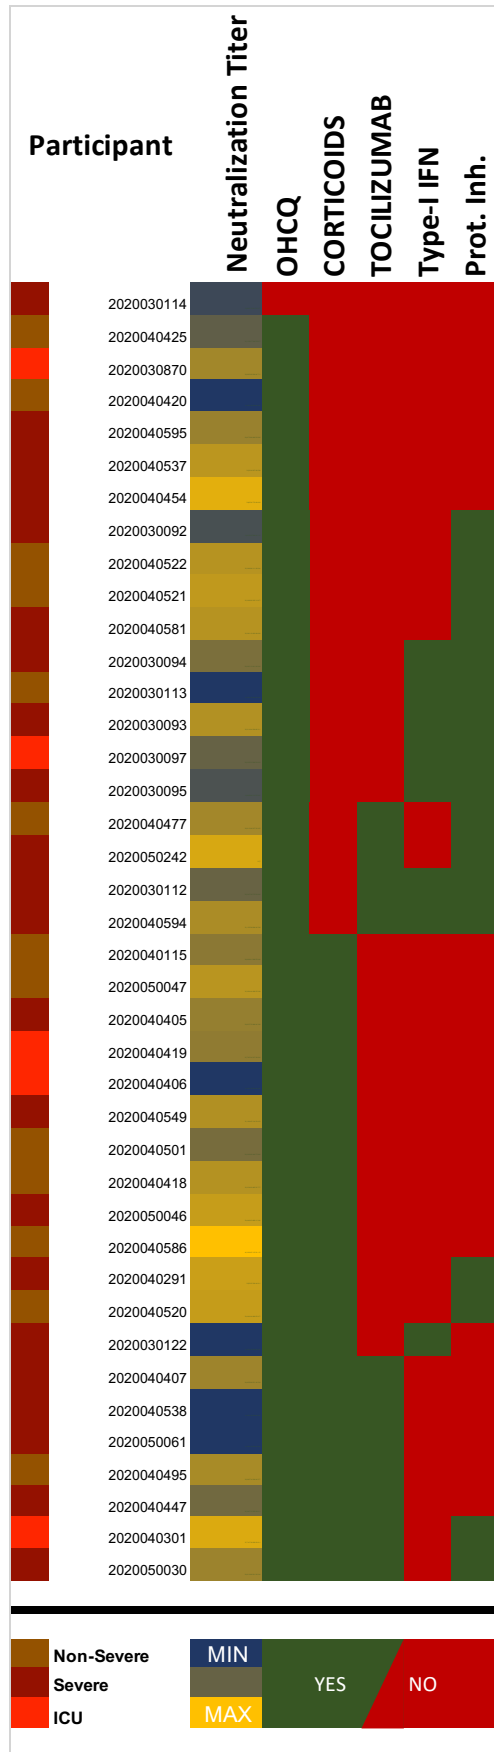

**Supplementary Figure 2.** Analysis of neutralizing activity according to drug combinations.
